# Supplementary material for: MRI-Based Radiomics Analysis of Levator Ani Muscle for Predicting Urine Incontinence after Robot-Assisted Radical Prostatectomy
Source: MDPI journal article supplement (doi:10.3390/diagnostics13182913), 2023-09-11
Supplement: s1 [file s1]

# Supplementary Material: MRI-Based Radiomics Analysis of Levator Ani Muscle for Predicting Urine Incontinence After Robot-Assisted Radical Prostatectomy

Mohammed Shahait, Ruben Usamentiaga, Yubing Tong, Alex Sandberg, David I. Lee, Jayaram K. Udupa, and Drew A. Torigian

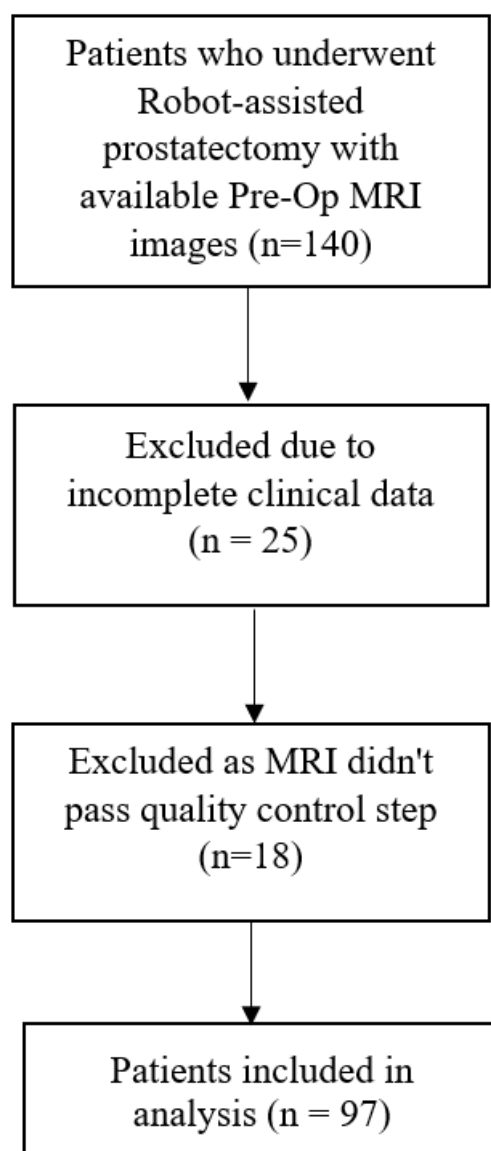

**Figure S1.** Consort Diagram: A Visual Representation of Study Participant Flow and Analysis.

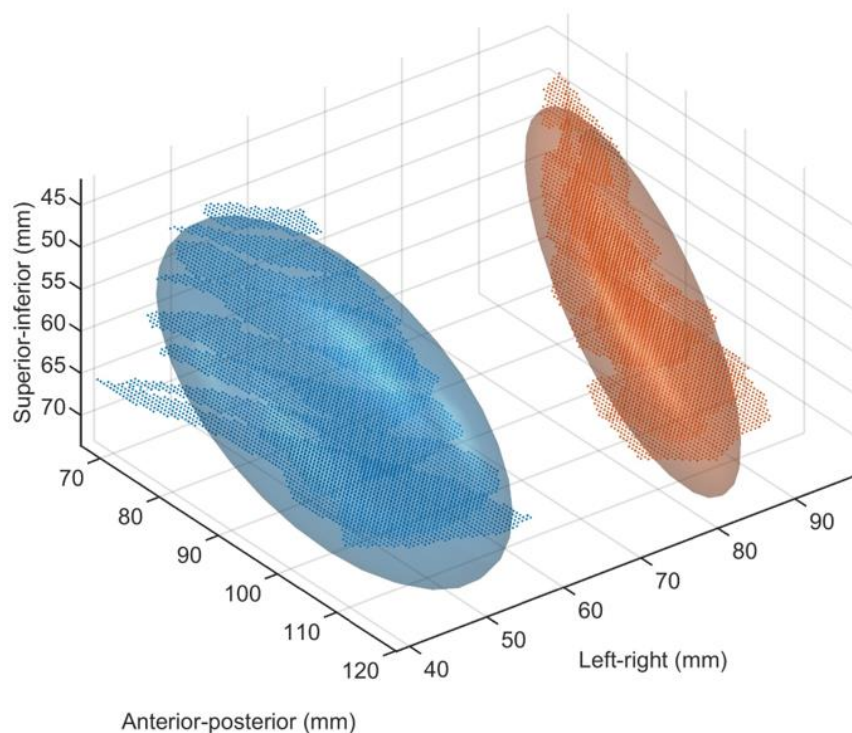

**Figure S2.** 3D representation of the equivalent ellipsoids for the left and right components of the levator ani muscle.

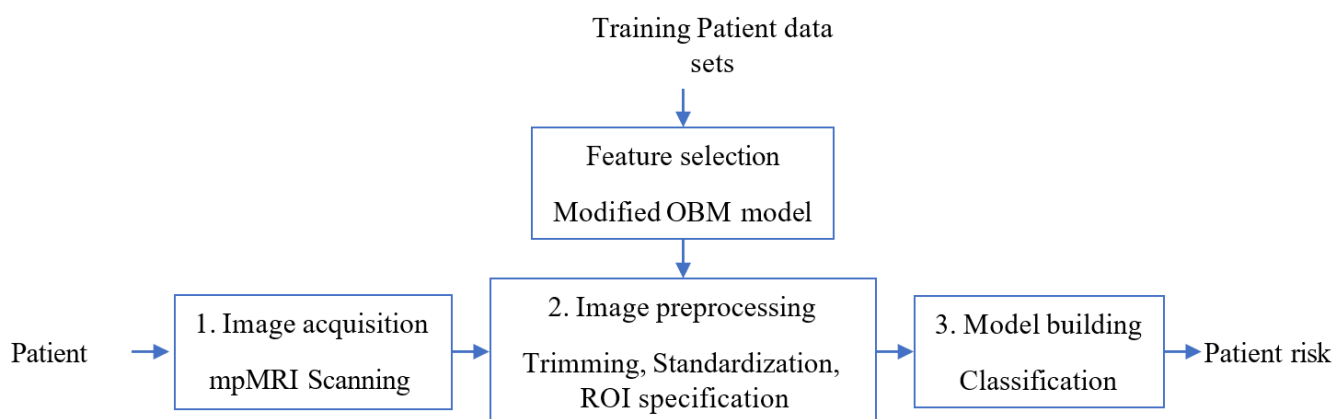

**Figure S3.** Workflow of the proposed approach, integrating Multiparametric Magnetic Resonance Imaging (mpMRI), delineation of the Region of Interest (ROI) and Optimal Biomarker Method (OBM).

**Table S1.** Summary of patient cohort characteristics.

| Variable                                      | Overall N=97          |           |
|-----------------------------------------------|-----------------------|-----------|
| Age (years)                                   | Median                | 63.5      |
|                                               | IQR                   | 57.7-69.9 |
| BMI (kg/m <sup>2</sup> )                      | Median                | 27.8      |
|                                               | IQR                   | 25.0-32.0 |
| American Urological Association Symptom Index | Median                | 7         |
|                                               | IQR                   | 3.75-13   |
| Preoperative PSA (ng/mL)                      | Median                | 5.7       |
|                                               | IQR                   | 4.4-8.2   |
| Prostate Size (ml)                            | Median                | 40.5      |
|                                               | IQR                   | 28.6-56.7 |
| Pathological Gleason Score                    | 6                     | 37        |
|                                               | 7                     | 53        |
|                                               | 8                     | 4         |
|                                               | ≥9                    | 3         |
| Surgical Margin                               | Positive              | 22        |
|                                               | Negative              | 75        |
| Pathological T Stage                          | ≤ T2c                 | 66        |
|                                               | T3a                   | 26        |
|                                               | T3b                   | 5         |
| Membranous urethral length                    | Mean                  | 13.65     |
|                                               | +SD                   | 2.13      |
| Nerve Sparing                                 | Full Nerve Sparing *  | 95        |
|                                               | Partial Nerve sparing | 1         |
|                                               | No Nerve sparing      | 1         |

\*(at least on one side) (BMI: Body Mass Index; IQR: Interquartile Range; PSA: Prostate-Specific Antigen).

**Table S2.** Summary of the features.

| Category    | Number of features | Description                                                  |
|-------------|--------------------|--------------------------------------------------------------|
| Morphologic | 35                 | Volume, surface area, eigenvalues, ratios, ...               |
| Intensity   | 14                 | Max, min, std, mean, median, mode, moments, ...              |
| Texture     | 7616               | Features from local binary patterns and co-occurrence matrix |
| Clinical    | 4                  | Age, prostate volume, urethral length, and body mass index   |
| Total       | 7669               |                                                              |

**Table S3.** Univariate analysis of features sorted by p-value (top 10). The table shows the mean value of each feature for the positive and negative patients, the variability of the means and the p-value.

| Feature                         | Mean (pos.) | Mean (neg.) | Std (pos.) | Std (neg.) | p-value |
|---------------------------------|-------------|-------------|------------|------------|---------|
| Age                             | 60.94       | 66.80       | 7.22       | 6.96       | 0.0004  |
| GLCM mode a45 d3 b10 w3 f5      | 14716.40    | 9941.45     | 8312.35    | 7518.14    | 0.0087  |
| GLCM mode a360 d3 b20 w3 f3     | 1375.06     | 1484.30     | 166.19     | 212.29     | 0.0093  |
| GLCM skewness a180 d3 b10 w1 f3 | 288.65      | 271.52      | 27.65      | 32.47      | 0.0107  |

|                                 |           |           |          |          |        |
|---------------------------------|-----------|-----------|----------|----------|--------|
| GLCM minimum a135 d1 b10 w3 f1  | 1613.42   | 1661.67   | 83.30    | 88.47    | 0.0126 |
| GLCM mode a360 d1 b10 w2 f5     | 17409.83  | 11933.45  | 9379.52  | 10205.31 | 0.0127 |
| GLCM maximum a360 d3 b20 w1 f2  | 1863.64   | 1858.58   | 9.48     | 8.14     | 0.0129 |
| GLCM mode a45 d3 b5 w3 f5       | 23792.34  | 16974.15  | 11199.85 | 13953.88 | 0.0145 |
| GLCM kurtosis a180 d3 b10 w1 f3 | 168043.38 | 156074.23 | 19802.32 | 24487.44 | 0.0149 |
| GLCM minimum a360 d3 b20 w1 f1  | 1032.83   | 1048.18   | 30.40    | 23.75    | 0.0156 |

(GLCM: Gray-Level Co-occurrence Matrix).

**Table S4.** Univariate analysis of features in the category morphologic sorted by p-value (top 10).

| Feature                    | Mean (pos.) | Mean (neg.) | Std (pos.) | Std (neg.) | p-value |
|----------------------------|-------------|-------------|------------|------------|---------|
| Ratio surface left/right   | 1.06        | 1.02        | 0.09       | 0.10       | 0.0506  |
| Ratio volume left/right    | 1.07        | 1.01        | 0.20       | 0.15       | 0.1068  |
| Ratio evalue3/slambda left | 0.42        | 0.40        | 0.14       | 0.12       | 0.3718  |
| Ratio slambda left/right   | 1.01        | 1.00        | 0.06       | 0.07       | 0.4080  |
| Evalue1 right              | 113.51      | 119.47      | 33.60      | 41.17      | 0.4653  |
| Evalue3 left               | 5.28        | 5.02        | 1.77       | 1.49       | 0.4850  |
| Slambda right              | 12.43       | 12.70       | 1.67       | 1.86       | 0.4876  |
| Evalue3 right              | 5.01        | 5.23        | 1.56       | 1.39       | 0.5068  |
| Ratio surface/volume left  | 0.68        | 0.70        | 0.09       | 0.11       | 0.5075  |
| Ratio evalue2 left/right   | 1.11        | 1.08        | 0.20       | 0.26       | 0.5299  |

(evalue1 represents the largest eigenvalue and evalue3 the smallest eigenvalue).

**Table S5.** Univariate analysis of features in the category intensity sorted by p-value (top 10).

| Feature       | Mean (pos.) | Mean (neg.) | Std (pos.) | Std (neg.) | p-value |
|---------------|-------------|-------------|------------|------------|---------|
| Third moment  | 83381.72    | 54425.30    | 82317.34   | 45273.54   | 0.0676  |
| Skewness      | 43.58       | 37.32       | 17.22      | 12.92      | 0.0761  |
| Fourth moment | 1.20e+08    | 6.78e+07    | 1.61e+08   | 7.73e+07   | 0.0862  |
| Second moment | 139.68      | 117.51      | 72.20      | 59.19      | 0.1425  |
| Kurtosis      | 4596.48     | 3806.07     | 3149.53    | 1820.83    | 0.1938  |
| Maximum       | 2239.60     | 2067.21     | 729.49     | 618.27     | 0.2626  |
| STD           | 228.13      | 209.18      | 76.28      | 75.60      | 0.2644  |
| Mode          | 277.19      | 299.70      | 107.46     | 154.35     | 0.4278  |
| Peak          | 1.17        | 1.11        | 0.41       | 0.49       | 0.5672  |
| Low quartile  | 251.55      | 262.58      | 77.69      | 113.27     | 0.5937  |

(STD: Standard Deviation)

**Table S6.** Univariate analysis of features in the clinical category sorted by p-value.

| Feature                    | Mean (pos.) | Mean (neg.) | Std (pos.) | Std (neg.) | p-value |
|----------------------------|-------------|-------------|------------|------------|---------|
| Age                        | 60.94       | 66.80       | 7.22       | 6.96       | 0.0004  |
| Membranous urethral length | 13.86       | 13.44       | 1.84       | 1.57       | 0.2723  |
| Prostate size              | 47.20       | 41.63       | 28.79      | 26.16      | 0.3692  |
| BMI                        | 30.03       | 30.26       | 6.58       | 5.81       | 0.8717  |

**Table S7.** Optimal subset of features.

| Feature                           |
|-----------------------------------|
| 1: Age                            |
| 2: Ratio evalue1/slambda right    |
| 3: GLCM mode a180 d1 b10 w3 f5    |
| 4: GLCM maximum a45 d3 b20 w1 f3  |
| 5: GLCM maximum a45 d3 b20 w1 f1  |
| 6: GLCM minimum a360 d1 b10 w1 f3 |

**Table S8.** Performance of the optimal subset of features.

| <b>Metric</b>     | <b>Value</b> |
|-------------------|--------------|
| Accuracy          | 0.843        |
| Balanced accuracy | 0.832        |
| Recall            | 0.906        |
| Precision         | 0.865        |
| F1                | 0.864        |
| ROC AUC           | 0.885        |
| Sensitivity       | 0.906        |
| Specificity       | 0.758        |

(F1: F1 score; ROC: Receiver Operating Characteristic; AUC: Area Under the Curve).

**Table S9.** Performance of different subsets of features.

| <b>Subset of features</b>                     | <b>Accuracy</b> | <b>Balanced accuracy</b> |
|-----------------------------------------------|-----------------|--------------------------|
| Optimal                                       | 0.843           | 0.832                    |
| All in the clinical category                  | 0.767           | 0.742                    |
| All in the morphologic and intensity category | 0.615           | 0.531                    |
| All in the texture category                   | 0.762           | 0.740                    |
| Only the age feature                          | 0.756           | 0.742                    |
| Only the BMI feature                          | 0.618           | 0.496                    |
| Optimal without ratio evaluel/slambda right   | 0.816           | 0.800                    |
